# Supplementary material for: Diet Quality of Elite Australian Athletes Evaluated Using the Athlete Diet Index
Source: PubMed Central journal article supplement (PMC7823332; doi:10.3390/nu13010126), 2020-12-31
Supplement: nutrients-13-00126-s001.pdf [file nutrients-13-00126-s001.pdf]

**Supplementary Material S1.** Exemplar of an athlete’s ADI results including the scores achieved for the individual dietary components within each sub-category, sub-scores, and total ADI score

| Core Nutrition                                | Maximum   | Your score |
|-----------------------------------------------|-----------|------------|
| Intake of fruit                               | 10        | 10         |
| Variety of types of fruit                     | 5         | 5          |
| Intake of vegetables                          | 10        | 8          |
| Variety of types of vegetables                | 5         | 4          |
| Intake of grains, breads, and cereals         | 10        | 5          |
| Consume wholegrain bread more often           | 5         | 0          |
| Intake of dairy and dairy alternatives        | 10        | 8          |
| Consume reduced fat milk more often           | 5         | 3          |
| Intake of lean meat and protein alternatives  | 10        | 2          |
| Intake of discretionary foods:                |           |            |
| Sweet and savoury snack foods                 | 3         | 2          |
| Processed meats                               | 1         | 1          |
| Frequency of eating out of home/takeaway food | 3         | 3          |
| Intake of alcohol                             | 3         | 1          |
| <b>sub-score</b>                              | <b>80</b> | <b>52</b>  |

| Special Nutrients - Dietary Indicators     | Maximum   | Your score |
|--------------------------------------------|-----------|------------|
| Foods rich in essential fatty acids        | 5         | 3          |
| Foods rich in antioxidant vitamins         | 10        | 5          |
| Foods rich in the specific micronutrients: |           |            |
| Calcium                                    | 10        | 8          |
| Iron                                       | 10        | 5          |
| <b>sub-score</b>                           | <b>35</b> | <b>21</b>  |

| Dietary Habits                                         | Maximum    | Your score |
|--------------------------------------------------------|------------|------------|
| Healthy dietary pattern                                | 2          | 2          |
| Distribution of food intake over the day               | 2          | 1          |
| Nutrition practices that support training:             |            |            |
| Eating before training                                 | 2          | 2          |
| Eating after training                                  | 2          | 1          |
| Hydration choices                                      | 2          | 2          |
| <b>sub-score</b>                                       | <b>10</b>  | <b>8</b>   |
| <b>Total ADI score (H &gt; 90; M 66-89; L &lt; 65)</b> | <b>125</b> | <b>81</b>  |

ADI, Athlete Diet Index; H, high; M, medium; L, low

Supplementary Material S2. Evaluation survey items for the sports dietitians and developed on Qualtrics™

**Please list the sports for athletes where you provide dietetic support and who used the dietary assessment tools**

---

---

---

**Please select the most appropriate response for each tool (i.e. PEAKS-NQ & ADI)**

Q1. The tools helped to provide useful information which I could use to support the nutrition care of my athletes

|          | Strongly agree        | Somewhat agree        | Neither agree nor disagree | Somewhat disagree     | Strongly disagree     |
|----------|-----------------------|-----------------------|----------------------------|-----------------------|-----------------------|
| PEAKS-NQ | <input type="radio"/> | <input type="radio"/> | <input type="radio"/>      | <input type="radio"/> | <input type="radio"/> |
| ADI      | <input type="radio"/> | <input type="radio"/> | <input type="radio"/>      | <input type="radio"/> | <input type="radio"/> |

Q2. The tools helped with prioritising nutrition support to specific athletes

|          | Strongly agree        | Somewhat agree        | Neither agree nor disagree | Somewhat disagree     | Strongly disagree     |
|----------|-----------------------|-----------------------|----------------------------|-----------------------|-----------------------|
| PEAKS-NQ | <input type="radio"/> | <input type="radio"/> | <input type="radio"/>      | <input type="radio"/> | <input type="radio"/> |
| ADI      | <input type="radio"/> | <input type="radio"/> | <input type="radio"/>      | <input type="radio"/> | <input type="radio"/> |

Q3. The tools helped me to screen the athletes and determine what kind of nutrition support

they needed most

|          | Strongly agree        | Somewhat agree        | Neither agree nor disagree | Somewhat disagree     | Strongly disagree     |
|----------|-----------------------|-----------------------|----------------------------|-----------------------|-----------------------|
| PEAKS-NQ | <input type="radio"/> | <input type="radio"/> | <input type="radio"/>      | <input type="radio"/> | <input type="radio"/> |
| ADI      | <input type="radio"/> | <input type="radio"/> | <input type="radio"/>      | <input type="radio"/> | <input type="radio"/> |

---

Q4. The tools helped me to identify athletes with low levels of nutrition knowledge or those that needed to improve their diets that might have not been identified otherwise

|          | Strongly agree        | Somewhat agree        | Neither agree nor disagree | Somewhat disagree     | Strongly disagree     |
|----------|-----------------------|-----------------------|----------------------------|-----------------------|-----------------------|
| PEAKS-NQ | <input type="radio"/> | <input type="radio"/> | <input type="radio"/>      | <input type="radio"/> | <input type="radio"/> |
| ADI      | <input type="radio"/> | <input type="radio"/> | <input type="radio"/>      | <input type="radio"/> | <input type="radio"/> |

---

Q5. The tools provided information on knowledge and use of dietary supplements and other eating behaviours and practices that cause concern in athletes under my care

|          | Strongly agree        | Somewhat agree        | Neither agree nor disagree | Somewhat disagree     | Strongly disagree     |
|----------|-----------------------|-----------------------|----------------------------|-----------------------|-----------------------|
| PEAKS-NQ | <input type="radio"/> | <input type="radio"/> | <input type="radio"/>      | <input type="radio"/> | <input type="radio"/> |
| ADI      | <input type="radio"/> | <input type="radio"/> | <input type="radio"/>      | <input type="radio"/> | <input type="radio"/> |

---

Q6. I would use these tools again to support the nutrition care of athletes

|          | Strongly agree        | Somewhat agree        | Neither agree nor disagree | Somewhat disagree     | Strongly disagree     |
|----------|-----------------------|-----------------------|----------------------------|-----------------------|-----------------------|
| PEAKS-NQ | <input type="radio"/> | <input type="radio"/> | <input type="radio"/>      | <input type="radio"/> | <input type="radio"/> |
| ADI      | <input type="radio"/> | <input type="radio"/> | <input type="radio"/>      | <input type="radio"/> | <input type="radio"/> |

---

Q7. It was useful to have total and section scores.

|          | Strongly agree        | Somewhat agree        | Neither agree nor disagree | Somewhat disagree     | Strongly disagree     |
|----------|-----------------------|-----------------------|----------------------------|-----------------------|-----------------------|
| PEAKS-NQ | <input type="radio"/> | <input type="radio"/> | <input type="radio"/>      | <input type="radio"/> | <input type="radio"/> |
| ADI      | <input type="radio"/> | <input type="radio"/> | <input type="radio"/>      | <input type="radio"/> | <input type="radio"/> |

---

Q8. It was practical and time efficient for the athletes to complete the tools electronically

|          | Strongly agree        | Somewhat agree        | Neither agree nor disagree | Somewhat disagree     | Strongly disagree     |
|----------|-----------------------|-----------------------|----------------------------|-----------------------|-----------------------|
| PEAKS-NQ | <input type="radio"/> | <input type="radio"/> | <input type="radio"/>      | <input type="radio"/> | <input type="radio"/> |
| ADI      | <input type="radio"/> | <input type="radio"/> | <input type="radio"/>      | <input type="radio"/> | <input type="radio"/> |

---

Q9. It was helpful to have automated scoring and feedback after the athletes completed each tool

|          | Strongly agree        | Somewhat agree        | Neither agree nor disagree | Somewhat disagree     | Strongly disagree     |
|----------|-----------------------|-----------------------|----------------------------|-----------------------|-----------------------|
| PEAKS-NQ | <input type="radio"/> | <input type="radio"/> | <input type="radio"/>      | <input type="radio"/> | <input type="radio"/> |
| ADI      | <input type="radio"/> | <input type="radio"/> | <input type="radio"/>      | <input type="radio"/> | <input type="radio"/> |

---

Q10. I would use these tools to justify and advocate to the sport/coach and administration to continue or enhance the nutrition servicing I provide to the athletes under my care

|          | Strongly agree        | Somewhat agree        | Neither agree nor disagree | Somewhat disagree     | Strongly disagree     |
|----------|-----------------------|-----------------------|----------------------------|-----------------------|-----------------------|
| PEAKS-NQ | <input type="radio"/> | <input type="radio"/> | <input type="radio"/>      | <input type="radio"/> | <input type="radio"/> |
| ADI      | <input type="radio"/> | <input type="radio"/> | <input type="radio"/>      | <input type="radio"/> | <input type="radio"/> |

**Questions 11-12 are asking you about the usefulness of the feedback provided**

---

Q11. The feedback report was informative, useful and athlete friendly

|          | Strongly agree        | Somewhat agree        | Neither agree nor disagree | Somewhat disagree     | Strongly disagree     |
|----------|-----------------------|-----------------------|----------------------------|-----------------------|-----------------------|
| PEAKS-NQ | <input type="radio"/> | <input type="radio"/> | <input type="radio"/>      | <input type="radio"/> | <input type="radio"/> |
| ADI      | <input type="radio"/> | <input type="radio"/> | <input type="radio"/>      | <input type="radio"/> | <input type="radio"/> |

---

Q12. The feedback report provided a useful way for me to follow-up with the athlete and address specific issues to support their nutrition care

|          | Strongly agree        | Somewhat agree        | Neither agree nor disagree | Somewhat disagree     | Strongly disagree     |
|----------|-----------------------|-----------------------|----------------------------|-----------------------|-----------------------|
| PEAKS-NQ | <input type="radio"/> | <input type="radio"/> | <input type="radio"/>      | <input type="radio"/> | <input type="radio"/> |
| ADI      | <input type="radio"/> | <input type="radio"/> | <input type="radio"/>      | <input type="radio"/> | <input type="radio"/> |

**Any other comments/feedback:**

---

---

**Supplementary Material S3.** Rating of level of agreement to survey items by the accredited sports dietitians (ASDs) who completed the electronic evaluation survey

| Survey item                                                                      | Strongly agree (%) | Somewhat agree (%) | Neither agree nor disagree (%) | Somewhat disagree (%) | Strongly disagree (%) |
|----------------------------------------------------------------------------------|--------------------|--------------------|--------------------------------|-----------------------|-----------------------|
| <b>Usefulness of the ADI</b>                                                     |                    |                    |                                |                       |                       |
| 1. Provided useful information to support the nutrition care of my athletes      | 9 (75)             | 3 (25)             |                                |                       |                       |
| 2. Provided information on eating practices of concern and supplement use        | 5 (42)             | 5 (42)             | 1 (8)                          | 1 (8)                 |                       |
| <b>Enhancement of sports nutrition practice</b>                                  |                    |                    |                                |                       |                       |
| 3. Helpful for screening and identifying key areas for nutrition support         | 10 (83)            | 2 (17)             |                                |                       |                       |
| 4. Helpful for identifying athletes with poor diet quality                       | 7 (58)             | 5 (42)             |                                |                       |                       |
| 5. Helped prioritise nutrition support for specific athletes                     | 6 (50)             | 6 (50)             |                                |                       |                       |
| 6. Would use to justify and advocate for nutrition services to athletes          | 10 (83)            | 2 (17)             |                                |                       |                       |
| <b>Automated feedback report</b>                                                 |                    |                    |                                |                       |                       |
| 7. Useful to receive the overall ADI and section scores                          | 7 (58)             | 5 (42)             |                                |                       |                       |
| 8. Automated scoring and the feedback report were helpful                        | 12 (100)           |                    |                                |                       |                       |
| 9. Feedback report was informative, useful and athlete-friendly                  | 7 (58)             | 4 (33)             | 1 (8)                          |                       |                       |
| 10. Provided a useful way to follow-up and address specific issues with athletes | 8 (67)             | 4 (33)             |                                |                       |                       |
| <b>Feasibility of the ADI</b>                                                    |                    |                    |                                |                       |                       |
| 11. Practical and time efficient for athletes to complete electronically         | 10 (83)            | 1 (8)              | 1 (8)                          |                       |                       |
| <b>Acceptability of the ADI</b>                                                  |                    |                    |                                |                       |                       |
| 12. Would use the tool again to support the nutrition care of athletes           | 9 (75)             | 3 (25)             |                                |                       |                       |

ADI, Athlete Diet Index; ASDs, Accredited Sports Dietitians (n=12)
